# Supplementary material
Source: PubMed Central journal article supplement (PMC3597987)
Supplement: NIHMS437957-supplement-01.pdf [file NIHMS437957-supplement-01.pdf]

**Supplemental Figure 1** ROI distribution in MDS space for CVM metric. The distribution reveals the correlation of CVM with expert consensus.

**Supplemental Figure 2** Mean intra cluster and inter exemplar CVM values for the computed class.

**Supplemental Figure 3** Comparison of nodule size between Training and Validation Set. NS= not significant (two-tailed t-test)
